# Supplementary material
Source: Springer Nature journal article supplement (https://www.springermedizin.de/resource/supplementary/12913_2011_1792_MOESM3_ESM.pdf/9528950)

**Leadership**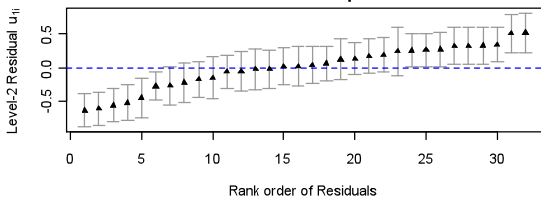**Culture**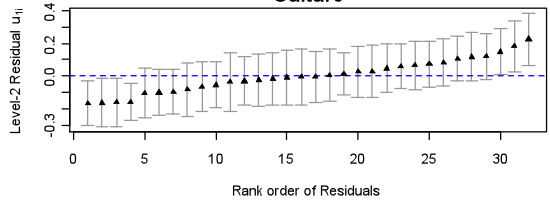**Evaluation**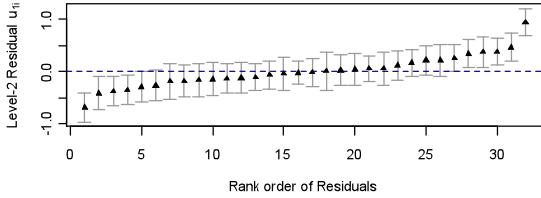**Social Capital**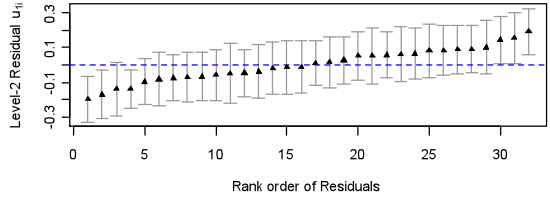**Formal Interactions**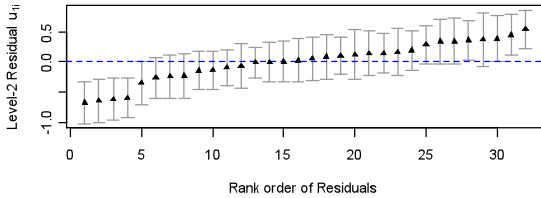**Informal Interactions**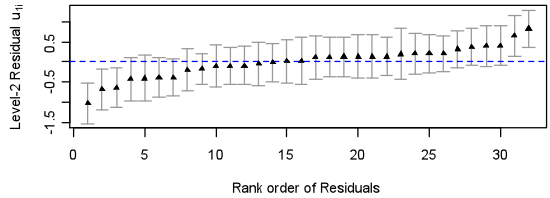**OS-Staff**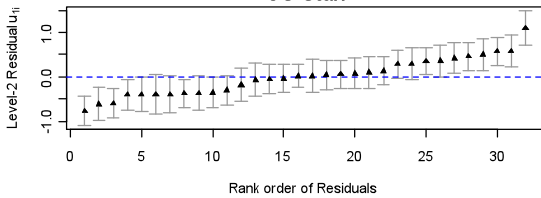**OS-Space**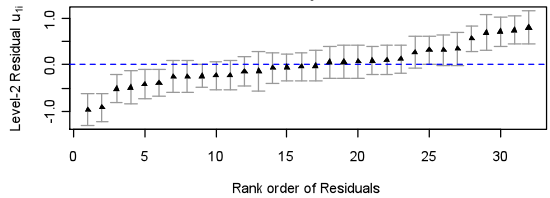**OS-Time**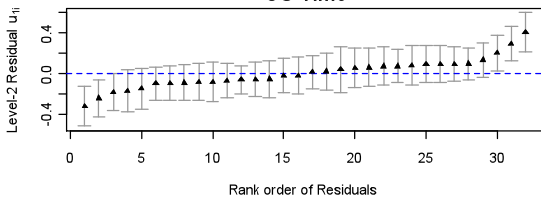**Structural and Electronic Resources**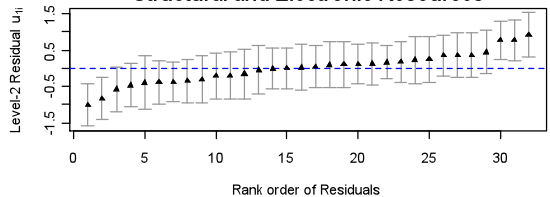

Supplement: MOESM3 [file 9528950]
